# Supplementary material for: Activation of NF-κB and induction of proinflammatory cytokine expressions mediated by ORF7a protein of SARS-CoV-2
Source: PubMed Central journal article supplement (PMC8242070; doi:10.1038/s41598-021-92941-2), 2021-06-29

**Activation of NF- $\kappa$ B and Induction of Proinflammatory Cytokine Expressions Mediated by  
ORF7a Protein of SARS-CoV-2**

Chia-Ming Su<sup>1</sup>), Leyi Wang<sup>2</sup>), Dongwan Yoo<sup>1</sup>), \*

<sup>1</sup>) Department of Pathobiology, <sup>2</sup>) Veterinary Diagnostic Laboratory and Department of  
Veterinary Clinical Medicine, University of Illinois at Urbana-Champaign, Urbana, IL USA

\*Corresponding author mailing address:

Dongwan Yoo

Department of Pathobiology

University of Illinois at Urbana-Champaign

2001 Lincoln Ave, Urbana, IL 61802 USA

Email: [dyoo@illinois.edu](mailto:dyoo@illinois.edu)

Phone: 217-244-9120

**Supplementary Table S1. Primer sequences for RT-qPCR**

| <b>Primer name</b> | <b>Primer sequence</b>            |
|--------------------|-----------------------------------|
| hIL-6-F            | 5'-GTAGCCGCCCCACACAGA-3'          |
| hIL-6-R            | 5'-CATGTCTCCTTTCTCAGGGCTG-3'      |
| hIL-8-F            | 5'-ATAAAGACATACTCCAAACCTTTCCAC-3' |
| hIL-8-R            | 5'-AAGCTTTACAATAATTTCTGTGTTGGC-3' |
| hTNF- $\alpha$ -F  | 5'-TCCTCAGCCTCTTCTCCTTCCT-3'      |
| hTNF- $\alpha$ -R  | 5'-ACTCCAAAGTGCAGCAGACAGA-3'      |
| hIL-1b-F           | 5'-AAATACCTGTGGCCTTGGGC-3'        |
| hIL-1b-R           | 5'-TTTGGGATCTACACTCTCCAGCT-3'     |
| hRANTES-F          | 5'-TTTGCCTACATTGCCCGC-3'          |
| hRANTES-R          | 5'-TTTCGGGTGACAAAGACGACT-3'       |
| hGM-CSF-F          | 5'-AGACACTGCTGCTGAGATGAA-3'       |
| hGM-CSF-R          | 5'-AGGCCCTGCTTGTACAGCT-3'         |
| hIL-1a-F           | 5'-ATCAGTACCTCACGGCTGCT-3'        |
| hIL-1a-R           | 5'-TGGGTATCTCAGGCATCTCC-3'        |
| hIFN-b-F           | 5'-GATTCATCTAGCACTGGCTGG-3'       |
| hIFN-b-R           | 5'-CTTCAGGTAATGCAGAATCC-3'        |
| hIP-10-F           | 5'-TGACTCTAAGTGGCATTCAAGGAG-3'    |
| hIP-10-R           | 5'-TTTTTCTAAAGACCTTGGATTAACAGG-3' |
| hMCP1-F            | 5'-ACTCTCGCCTCCAGCATGAA-3'        |
| hMCP1-R            | 5'-TTGATTGCATCTGGCTGAGC-3'        |
| hIL-10-F           | 5'-TCATCGATTTTCTTCCCTGTG-3'       |
| hIL-10-R           | 5'-ATGGCTTTGTAGATGCCTTT-3'        |
| IL-2-F             | 5'-GAATCCCAAACCTCACCAGGATGCTC-3'  |
| IL-2-R             | 5'-TAGCACTTCCTCCAGAGGTTTGAGT-3'   |
| IL-3-F             | 5'-GCGATCTTTTGAGTCCAACG-3'        |
| IL-3-R             | 5'-GCTTCTGGTCCTGGAATGTG-3'        |
| IL-4-F             | 5'-CCAACCTGCTTCCCCCTCTG-3'        |
| IL-4-R             | 5'-TCTGTTACGGTCAACTCGGTG-3'       |
| IL-5-F             | 5'-AAGAGACCTTGGCACTGCTTTC-3'      |
| IL-5-R             | 5'-GGAACAGGAATCCTCAGAGTCTCA-3'    |
| IL-7-F             | 5'-TTGGACTTCCTCCCCTGATCC-3'       |
| IL-7-R             | 5'-TCGATGCTGACCATTAGAACAC-3'      |
| IL-13-F            | 5'-TGAGGAGCTGGTCAACATCA-3'        |
| IL-13-R            | 5'-CAGGTTGATGCTCCATACCAT-3'       |
| IL-15-F            | 5'-TTTCAGTGCAGGGCTTCCCTAA-3'      |
| IL-15-R            | 5'-GGGTGAACATCACTTTCCGTAT-3'      |

|                  |                                 |
|------------------|---------------------------------|
| IL17A-F          | 5'-CAATCCCACGAAATCCAGGATG-3'    |
| IL17A-R          | 5'-GGTGGAGATTCCAAGGTGAGG-3'     |
| IL18-F           | 5'-GATAGCCAGCCTAGAGGTATGG-3'    |
| IL18-R           | 5'-AAGAAGTGCTCGTCCTCGTC-3'      |
| IL-23-F          | 5'-GGACAACAGTCAGTTCTGCTT-3'     |
| IL-23-R          | 5'-CACAGGGCTATCAGGGAGC-3'       |
| IL-33-F          | 5'-GTTACTTTAGGAGAGAAACCACCAA-3' |
| IL-33-R          | 5'-TTGACAGGCAGCGAGTACCA-3'      |
| CXCL9-F          | 5'-TTGCTGGTTCTGATTGGAGTG-3'     |
| CXCL9-R          | 5'-AAGGTCTTTCAAGGATTGTAGGTG-3'  |
| CXCL13-F         | 5'-TTGAGGTGTAGATGTGTCCAAGA-3'   |
| CXCL13-R         | 5'-ATTCGATCAATGAAGCGTCTAGG-3'   |
| CCL1-F           | 5'-TGGATGGGTTTCAGAGGCACA-3'     |
| CCL1-R           | 5'-AGGGCAGAAGGAATGGTGTAG-3'     |
| CCL3-F           | 5'-TCTGGTGACAACCGAGTGGC-3'      |
| CCL3-R           | 5'-CCGATCACAGCCCTGAACAA-3'      |
| CCL4-F           | 5'-CCTCGCAACTTTGTGGTAGA-3'      |
| CCL4-R           | 5'-CAGTTCAGTTCAGGTCATACAC-3'    |
| CCL11-F          | 5'-ATACCCCTTCAGCGACTAGAG-3'     |
| CCL11-R          | 5'-GCTTTGGAGTTGGAGATTTTGG-3'    |
| CCL17-F          | 5'-CCAGGGATGCCATCGTTT-3'        |
| CCL17-R          | 5'-GGTGGAGGTCCCAGGTAGTC-3'      |
| CCL19-F          | 5'-AAGACTGCTGCCTGTCTGTGA-3'     |
| CCL19-R          | 5'-CTGGATGATGCGTTCTACCC-3'      |
| CCL20-F          | 5'-GACATAGCCCAAGAACAGAAA-3'     |
| CCL20-R          | 5'-GACAAGTCCAGTGAGGCACAA-3'     |
| CCL21-F          | 5'-TGAAGCCTGAACCCAAGATG-3'      |
| CCL21-R          | 5'-CAGCCATGCAGGGTAGAGC-3'       |
| CCL22-F          | 5'-GGAGGCAAAGAGTAGGGTGTAAT-3'   |
| CCL22-R          | 5'-TCAGCCAGAAAGGCATAGATAGA-3'   |
| CCL25-F          | 5'-CTGGCAACTGGAAAGAGGGAG-3'     |
| CCL25-R          | 5'-GGACGGCAAGAAACAGAAAGTG-3'    |
| CCL26-F          | 5'-ATCAGGCCCTTCTCAGGTTT-3'      |
| CCL26-R          | 5'-AATTGAGGCTGAGCCAAAGA-3'      |
| CCL27-F          | 5'-AGGCTGAGCAACATGAAGGG-3'      |
| CCL27-R          | 5'-TGCTGGGTGGCAGTAGGAAT-3'      |
| CCL28-F          | 5'-CATACTTCCATTGCCTCCA-3'       |
| CCL28-R          | 5'-TGCCCTGTTACTGTTCTCTT-3'      |
| TGF- $\alpha$ -F | 5'-GAGCCCTCGGTAAGTATGTTTAG-3'   |

|                  |                                |
|------------------|--------------------------------|
| TGF- $\alpha$ -R | 5'-CATAGTGGAGGTGACTTGTTAGAG-3' |
| LIF-F            | 5'-CCCATCACCCCTGTCAACG-3'      |
| LIF-R            | 5'-GGGCCACATAGCTTGTCCA-3'      |
| EGF-F            | 5'-AAGGTACTCTCGCAGGAAATGG-3'   |
| EGF-R            | 5'-ACATACTCTCTTGCCTTGACC-3'    |
| VEGFA-F          | 5'-ATCACGAAGTGGTGAAGTTC-3'     |
| VEGFA-R          | 5'-TGCTGTAGGAAGCTCATCTC-3'     |
| hGAPDH-F         | 5'-CGGAGTCAACGGATTTGGTCGTA-3'  |
| hGAPDH-R         | 5'-AGCCTTCTCCATGGTGGTGAAGAC-3' |

**Supplementary Figure S1. SARS-CoV-2 protein expression.**

The ORF3a, M, 7a, N genes of SARS-CoV-2 were fused with a FLAG-tag at the N-terminus and transfected into HeLa cells for 24 h. Cell lysates were prepared and subjected to immunoblot using  $\alpha$ -FLAG PAb. This figure presents the full-length gel and image of the blots for Fig. 1b.

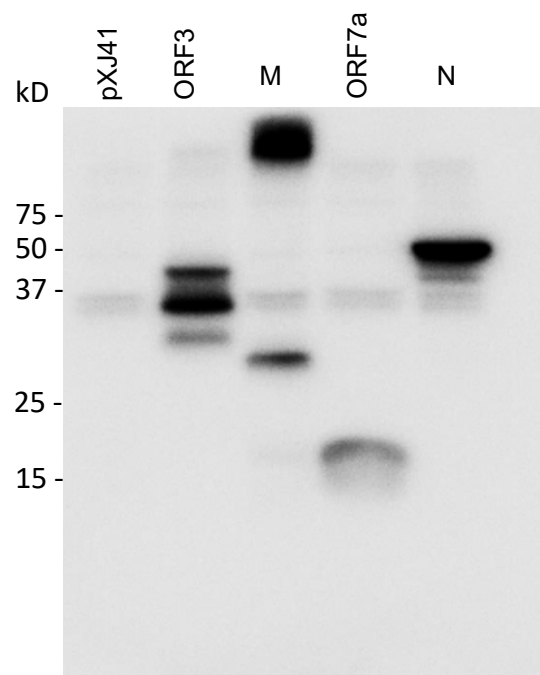

**Supplementary Figure S2. ORF3a protein expressions of clades L and V of SARS-CoV-2.**

ORF3a genes from clades L and V were fused with a FLAG-tag, cloned in the pXJ41 expression vector, and designated as ORF3a-L and ORF3a-V, respectively. ORF3a-L and ORF3a-V genes were transfected into HeLa cells for 24 h, and cell lysates were subjected to immunoblot using  $\alpha$ -FLAG PAb. This figure presents the full-length blot and image of Fig. 5b.

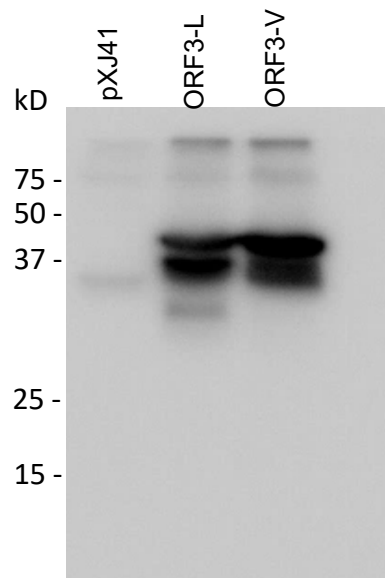

Supplement: 41598_2021_92941_MOESM1_ESM.pdf [file 41598_2021_92941_MOESM1_ESM.pdf]
